# Supplementary material for: Optimizing a Dynamic Infrared Emitter by Tailoring Titanium Carbide MXene Surface Chemistry
Source: Research Square preprint supplement (doi:10.21203/rs.3.rs-7713976/v1), 2025-11-03
Supplement: Supplementary file 1 [file 1f779e31ae3ea3fd8bf95ba4.docx]

**Supporting Information**

**Optimizing a Dynamic Infrared Emitter by Tailoring Titanium Carbide MXene Surface Chemistry**

Neda Daliran a, c, Ali Reza Oveisi b*, Zhiming Wang a, c*

a Institute of Fundamental and Frontier Sciences University of Electronic Science and Technology of China, Chengdu 611731, P. R. China

b Department of Organic Chemistry, Faculty of Chemistry, Lorestan University, Khorramabad, 68151-44316, Iran

c Shimmer Center, Tianfu Jiangxi Laboratory, Chengdu 641419, China

***Email Addresses****:* [*zhmwang@uestc.edu.cn*](mailto:zhmwang@uestc.edu.cn) *&* [*oveisi.a@lu.ac.ir*](mailto:oveisi.a@lu.ac.ir)

In figures S1 and S2, the emissivity plot of the VO2-tungstan (W) composite /SiO2/Ti3C2Tx MXene thermal emitter for two different VO2-W and SiO2 thicknesses across the temperature range of 298-332 K is provided.

**Figure S1**: Average emissivity of the thermal emitter VO2-W/SiO2/Ti3C2Tx with different surface terminations for two different VO2-W thicknesses. (a): VO2-W/SiO2/Ti3C2, (b): VO2-W/SiO2/Ti3C2F2, (c): VO2-W/SiO2/Ti3C2O2, (d) VO2-W/SiO2/Ti3C2(OH)2.

**Figure S2**: Average emissivity of the thermal emitter VO2-W/SiO2/Ti3C2Tx with different surface terminations for two different SiO2 thicknesses. (a): VO2-W/SiO2/Ti3C2, (b): VO2-W/SiO2/Ti3C2F2, (c): VO2-W/SiO2/Ti3C2O2, (d) VO2-W/SiO2/Ti3C2(OH)2.

**Table S1**. Thermal properties of the involved materials in the structure.

| **Materials** | **Thermal Conductivity (W/m. K)** | **density(Kg/m3)** | **Specific Heat Capacity**  **(J/kg. K)** |
| --- | --- | --- | --- |
| Ti3C2Tx MXene | Ref. 1 | 4210 2 | Ref. 3 |
| SiO2 | 29 | 3990 | 765 |
| VO2 | Ref. 4 | Ref. 5 | Ref. 6 |
| Tungsten | 175 | 19250 | 132.51 |
| Glass | 1.22 | 2380 | 700 |

**References**

1 Wang, M., Liu, Y., Zhang, H., Wu, Y. & Pan, L. Thermal conductivities of Ti3C2Tx MXenes and their interfacial thermal performance in MXene/epoxy composites – a molecular dynamics simulation. *International Journal of Heat and Mass Transfer* **194**, 123027, (2022).

2 <https://www.americanelements.com/titanium-carbide-ti3c2tx-12363-89-2>.

3 Srivatsa, S. *et al.* Temperature Evolution of Composition, Thermal, Electrical and Magnetic Properties of Ti3C2Tx-MXene. *Materials* **17**, 2199 (2024).

4 Hamaoui, G. *et al.* Thermophysical characterisation of VO2 thin films hysteresis and its application in thermal rectification. *Scientific Reports* **9**, 8728, (2019).

5 Lu, Y., Chen, L. l. & Liu, Z. w. in *IOP Conference Series: Materials Science and Engineering.* 012130 (IOP Publishing).

6 Popuri, S. *et al.* Structurally Restricted Phase Transitions in VO2(B) and Their Impact on Transport Properties. *The Journal of Physical Chemistry C* **119**, 25085-25092, doi:10.1021/acs.jpcc.5b07826 (2015).
